# Supplementary material
Source: publisher site journal article supplement (https://www.dovepress.com/article/427192)
Supplement: Supplementary file 1 [file get_supplementary_file.php]

**Supplementary information**

**A**


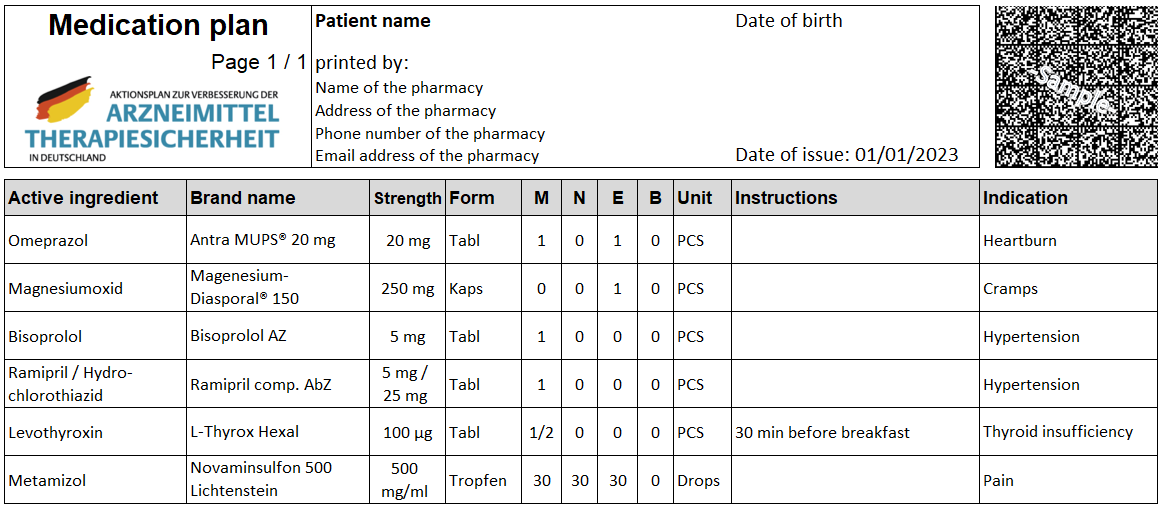


**B**


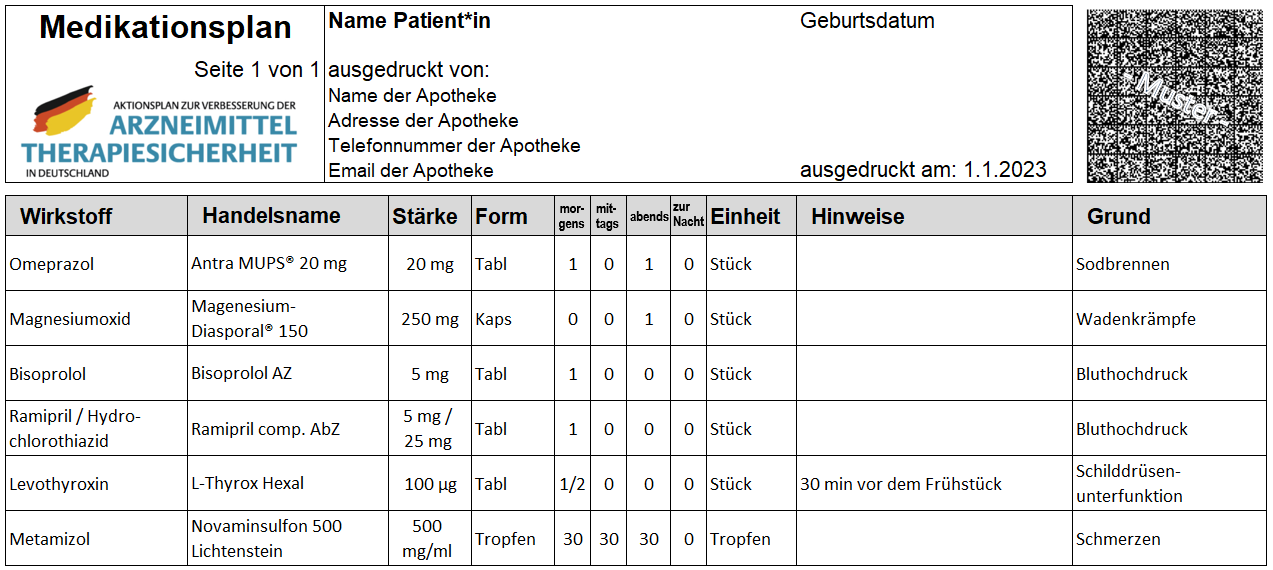


**Figure S1** Fictive standardized medication list (ML; in German “Medikationsplan”) listing several drugs. **(A)** English translation; **(B)** German original version.

**Notes**:

Logo top left: Drug Therapy Safety Action Plan logo standardized for all official medication lists. Top right image: 2D barcode according to Drug Therapy Safety Action Plan requirements.

Reprinted from Botermann L, Krueger K, Eickhoff C, Kloft C, Schulz M. Patients’ handling of a standardized medication plan: a pilot study and method development. Patient Prefer Adherence. 2016;22(10):621–630.5

**Abbreviations**:

**A** (Englisch): M, Morning; N, Noon; E, Evening; B, Bedtime; PCS, Pieces. **B** (German): Tabl, Tablette; min, Minute.
